# Supplementary material for: APOBEC3G acts as a therapeutic target in mesenchymal gliomas by sensitizing cells to radiation-induced cell death
Source: PubMed Central journal article supplement (PMC5589580; doi:10.18632/oncotarget.17348), 2017-04-21
Supplement: oncotarget-08-54285-s001.pdf [file oncotarget-08-54285-s001.pdf]

# APOBEC3G acts as a therapeutic target in mesenchymal gliomas by sensitizing cells to radiation-induced cell death

## Supplementary Materials

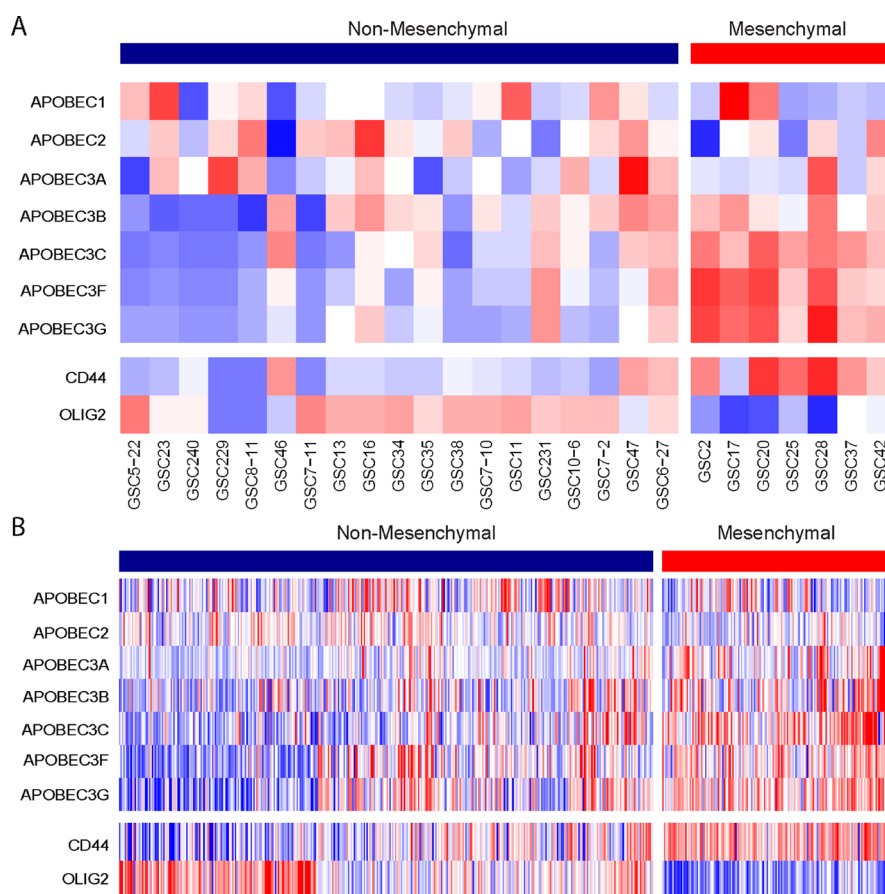

**Supplementary Figure 1:** (A) Gene expression analysis of APOBEC in a panel of 26 GICs are shown in the heat map. (B) Gene expression analysis of APOBEC in TCGA samples are shown in the heat map. CD44 is a marker of the mesenchymal subtype, whereas Olig-2 is the non-mesenchymal marker.

**Supplementary Dataset 1: mes\_VS-others GICs expression.** See Supplementary\_Dataset\_1

**Supplementary Dataset 2: DEGINTCGA.** See Supplementary\_Dataset\_2

**Supplementary Table 1: Primers for Real-time quantitative PCR**

---

|                |                          |
|----------------|--------------------------|
| GAPDH Forward  | GGAGCGAGATCCCTCCAAAAT    |
| GAPDH Reverse  | GGCTGTTGTCATACTTCTCATGG  |
| MMP2 Forward   | CAGGGAATGAGTACTGGGTCTATT |
| MMP2 Reverse   | ACTCCAGTTAAAGGCAGCATCTAC |
| TIMP-1 Forward | CTTCTGCAATTCCGACCTCGT    |
| TIMP-1 Reverse | ACGCTGGTATAAGGTGGTCTG    |
| TSP-1 Forward  | CCGGCGTGAAGTGTACTAGCTA   |
| TSP-1 Reverse  | TGCACTTGGCGTTCTTGTT      |

---
